# Supplementary material for: Association of COVID-19 with respiratory syncytial virus (RSV) infections in children aged 0–5 years in the USA in 2022: a multicentre retrospective cohort study
Source: HighWire-hosted journal article supplement (doi:10.1136/fmch-2023-002456), 2023-10-01
Supplement: fmch-2023-002456supp001_data_supplement.pdf [file fmch-2023-002456supp001_data_supplement.pdf]

## Supplemental File

**Supplemental Table 1:** Clinical diagnosis, lab-test and other codes used to determine the status of variables in the TriNetX database.

| Variables           | Name, code                                                                                                                                                                                                                                                                                                                                                                                                                                                                                                                                                                                                                                                                                                                                                                                                                                                                                                                                                                                                                                                                                                                                                                  | Data type                                 |
|---------------------|-----------------------------------------------------------------------------------------------------------------------------------------------------------------------------------------------------------------------------------------------------------------------------------------------------------------------------------------------------------------------------------------------------------------------------------------------------------------------------------------------------------------------------------------------------------------------------------------------------------------------------------------------------------------------------------------------------------------------------------------------------------------------------------------------------------------------------------------------------------------------------------------------------------------------------------------------------------------------------------------------------------------------------------------------------------------------------------------------------------------------------------------------------------------------------|-------------------------------------------|
| RSV infection (all) | <ul style="list-style-type: none"> <li>Respiratory syncytial virus RNA [Presence] in Specimen by NAA with probe detection (Logical Observation Identifiers Names and Codes (LOINC) code: 40988-8)</li> <li>Respiratory syncytial virus RNA [Presence] in Nasopharynx by NAA with probe detection (LOINC code 76089-2)</li> <li>Respiratory syncytial virus RNA [Presence] in Nasopharynx by NAA with non-probe detection (LOINC code 82176-9)</li> <li>Respiratory syncytial virus RNA [Presence] in Respiratory specimen by NAA with probe detection (LOINC code 92131-2)</li> <li>Respiratory syncytial virus RNA [Presence] in Isolate by NAA with probe detection (LOINC code 60271-4)</li> <li>Respiratory syncytial virus RNA [Presence] in Upper respiratory specimen by NAA with probe detection (LOINC code 85479-4)</li> <li>Respiratory syncytial virus Ag [Presence] in Specimen (LOINC code 31950-9)</li> <li>Respiratory syncytial virus Ag [Presence] in Nasopharynx by Rapid immunoassay (LOINC code 72885-7)</li> <li>Respiratory syncytial virus Ag [Presence] in Nose (LOINC code 33045-6)</li> <li>Respiratory syncytial virus Ab [Presence]</li> </ul> | positive/negative (LOINC lab result code) |

|                                               |                                                                                                                                                                                                                                                                                                                                                                                                                                                                                                                                                                                                                                        |                                                   |
|-----------------------------------------------|----------------------------------------------------------------------------------------------------------------------------------------------------------------------------------------------------------------------------------------------------------------------------------------------------------------------------------------------------------------------------------------------------------------------------------------------------------------------------------------------------------------------------------------------------------------------------------------------------------------------------------------|---------------------------------------------------|
|                                               | <p>in Serum<br/>(LOINC code 33390-6)</p> <ul style="list-style-type: none"> <li>• Respiratory syncytial virus Ag [Presence] in Specimen by Immunoassay (LOINC code 5876-8)</li> <li>• Respiratory syncytial virus Ag [Presence] in Specimen by Immunofluorescence (LOINC code 5877-6)</li> <li>• Respiratory syncytial virus as the cause of diseases classified elsewhere (The International Classification of Diseases, Tenth Revision (ICD-10) code: B97.4)</li> <li>• Respiratory syncytial virus pneumonia (ICD-10 code: J12.1)</li> <li>• Acute bronchiolitis due to respiratory syncytial virus (ICD-10 code: J21.0)</li> </ul> | <p>present/absent<br/>(ICD-10 diagnosis code)</p> |
| <p>RSV infection<br/>(clinical diagnosis)</p> | <ul style="list-style-type: none"> <li>• Respiratory syncytial virus as the cause of diseases classified elsewhere (The International Classification of Diseases, Tenth Revision (ICD-10) code: B97.4)</li> <li>• Respiratory syncytial virus pneumonia (ICD-10 code: J12.1)</li> <li>• Acute bronchiolitis due to respiratory syncytial virus (ICD-10 code: J21.0)</li> </ul>                                                                                                                                                                                                                                                         | <p>present/absent</p>                             |
| <p>RSV infection<br/>(positive lab test)</p>  | <ul style="list-style-type: none"> <li>• Respiratory syncytial virus RNA [Presence] in Specimen by NAA with probe detection (Logical Observation Identifiers Names and Codes (LOINC) code: 40988-8)</li> </ul>                                                                                                                                                                                                                                                                                                                                                                                                                         |                                                   |

|  |                                                                                                                                                                                                                                                                                                                                                                                                                                                                                                                                                                                                                                                                                                                                                                                                                                                                                                                                                                                                                                                                                                                                                                                                                                                            |                   |
|--|------------------------------------------------------------------------------------------------------------------------------------------------------------------------------------------------------------------------------------------------------------------------------------------------------------------------------------------------------------------------------------------------------------------------------------------------------------------------------------------------------------------------------------------------------------------------------------------------------------------------------------------------------------------------------------------------------------------------------------------------------------------------------------------------------------------------------------------------------------------------------------------------------------------------------------------------------------------------------------------------------------------------------------------------------------------------------------------------------------------------------------------------------------------------------------------------------------------------------------------------------------|-------------------|
|  | <ul style="list-style-type: none"><li>• Respiratory syncytial virus RNA [Presence] in Nasopharynx by NAA with probe detection (LOINC code 76089-2)</li><li>• Respiratory syncytial virus RNA [Presence] in Nasopharynx by NAA with non-probe detection (LOINC code 82176-9)</li><li>• Respiratory syncytial virus RNA [Presence] in Respiratory specimen by NAA with probe detection (LOINC code 92131-2)</li><li>• Respiratory syncytial virus RNA [Presence] in Isolate by NAA with probe detection (LOINC code 60271-4)</li><li>• Respiratory syncytial virus RNA [Presence] in Upper respiratory specimen by NAA with probe detection (LOINC code 85479-4)</li><li>• Respiratory syncytial virus Ag [Presence] in Specimen (LOINC code 31950-9)</li><li>• Respiratory syncytial virus Ag [Presence] in Nasopharynx by Rapid immunoassay (LOINC code 72885-7)</li><li>• Respiratory syncytial virus Ag [Presence] in Nose (LOINC code 33045-6)</li><li>• Respiratory syncytial virus Ab [Presence] in Serum (LOINC code 33390-6)</li><li>• Respiratory syncytial virus Ag [Presence] in Specimen by Immunoassay (LOINC code 5876-8)</li><li>• Respiratory syncytial virus Ag [Presence] in Specimen by Immunofluorescence (LOINC code 5877-6)</li></ul> | positive/negative |
|--|------------------------------------------------------------------------------------------------------------------------------------------------------------------------------------------------------------------------------------------------------------------------------------------------------------------------------------------------------------------------------------------------------------------------------------------------------------------------------------------------------------------------------------------------------------------------------------------------------------------------------------------------------------------------------------------------------------------------------------------------------------------------------------------------------------------------------------------------------------------------------------------------------------------------------------------------------------------------------------------------------------------------------------------------------------------------------------------------------------------------------------------------------------------------------------------------------------------------------------------------------------|-------------------|

|                                                      |                                                                                                                                                                                                                                                                                                                                                                                                                                                                                                                                                                                                  |                |
|------------------------------------------------------|--------------------------------------------------------------------------------------------------------------------------------------------------------------------------------------------------------------------------------------------------------------------------------------------------------------------------------------------------------------------------------------------------------------------------------------------------------------------------------------------------------------------------------------------------------------------------------------------------|----------------|
|                                                      | <ul style="list-style-type: none"> <li>Respiratory syncytial virus as the cause of diseases classified elsewhere (The International Classification of Diseases, Tenth Revision (ICD-10) code: B97.4)</li> <li>Respiratory syncytial virus pneumonia (ICD-10 code: J12.1)</li> <li>Acute bronchiolitis due to respiratory syncytial virus (ICD-10 code: J21.0)</li> </ul>                                                                                                                                                                                                                         |                |
| Bronchiolitis, non-specific                          | <ul style="list-style-type: none"> <li>Acute bronchiolitis, unspecified (ICD-10 code J21.9)</li> </ul>                                                                                                                                                                                                                                                                                                                                                                                                                                                                                           | present/absent |
| Visit                                                | <ul style="list-style-type: none"> <li>TNX:Visit</li> </ul>                                                                                                                                                                                                                                                                                                                                                                                                                                                                                                                                      | present/absent |
| Age                                                  | Age                                                                                                                                                                                                                                                                                                                                                                                                                                                                                                                                                                                              | continuous     |
| Female                                               | F                                                                                                                                                                                                                                                                                                                                                                                                                                                                                                                                                                                                | present/absent |
| Male                                                 | M                                                                                                                                                                                                                                                                                                                                                                                                                                                                                                                                                                                                | present/absent |
| Asian                                                | Asian (Demographics: 2028-9)                                                                                                                                                                                                                                                                                                                                                                                                                                                                                                                                                                     | present/absent |
| Black or African American                            | Black or African American (Demographics: 2054-5)                                                                                                                                                                                                                                                                                                                                                                                                                                                                                                                                                 | present/absent |
| White                                                | White (Demographics: 2106-3)                                                                                                                                                                                                                                                                                                                                                                                                                                                                                                                                                                     | present/absent |
| Hispanic/Latino                                      | Hispanic or Latino (Demographics: 2135-2)                                                                                                                                                                                                                                                                                                                                                                                                                                                                                                                                                        | present/absent |
| Not Hispanic or Latino                               | Not Hispanic or Latino (Demographics: 2186-5)                                                                                                                                                                                                                                                                                                                                                                                                                                                                                                                                                    | present/absent |
| Adverse socioeconomic and psychosocial circumstances | <p>Persons with potential health hazards related to socioeconomic and psychosocial circumstances (ICD-10 code: Z55-Z65), including:</p> <ul style="list-style-type: none"> <li>Problems related to education and literacy (Z55)</li> <li>Problems related to employment and unemployment (Z56)</li> <li>Occupational exposure to risk factors (Z57)</li> <li>Problems related to physical environment (Z58)</li> <li>Problems related to housing and economic circumstances (Z59)</li> <li>Problems related to social environment (Z60)</li> <li>Problems related to upbringing (Z62)</li> </ul> | present/absent |

|                                                                       |                                                                                                                                                                                                                                                                                         |                                                                 |
|-----------------------------------------------------------------------|-----------------------------------------------------------------------------------------------------------------------------------------------------------------------------------------------------------------------------------------------------------------------------------------|-----------------------------------------------------------------|
|                                                                       | <ul style="list-style-type: none"> <li>• Other problems related to primary support group, including family circumstances (Z63)</li> <li>• Problems related to certain psychosocial circumstances (Z64)</li> <li>• Problems related to other psychosocial circumstances (Z65)</li> </ul> |                                                                 |
| COVID-19                                                              | <ul style="list-style-type: none"> <li>• COVID-19 (ICD-10 code: U07.1)</li> <li>• SARS coronavirus 2 and related RNA [Presence] (LOINC code: 9088)</li> </ul>                                                                                                                           | present/absent (ICD-10 code)<br>Positive/negative (lab results) |
| Diseases related to blood and immune mechanisms                       | <ul style="list-style-type: none"> <li>• Diseases of the blood and blood-forming organs and certain disorders involving the immune mechanism (ICD-10 code: D50-D89)</li> </ul>                                                                                                          | present/absent                                                  |
| Diseases related to immune mechanisms                                 | <ul style="list-style-type: none"> <li>• Certain disorders involving the immune mechanism (ICD-10 code: D80-D89)</li> </ul>                                                                                                                                                             | present/absent                                                  |
| Chronic lower respiratory diseases                                    | <ul style="list-style-type: none"> <li>• Chronic lower respiratory diseases (ICD-10 code: J40-J47)</li> </ul>                                                                                                                                                                           | present/absent                                                  |
| Chronic lower respiratory diseases originating in the prenatal period | <ul style="list-style-type: none"> <li>• Chronic respiratory disease originating in the perinatal period (ICD-10 code: P27)</li> </ul>                                                                                                                                                  | present/absent                                                  |
| Asthma                                                                | <ul style="list-style-type: none"> <li>• Asthma (ICD-10 code: J45)</li> </ul>                                                                                                                                                                                                           | present/absent                                                  |
| Down syndrome                                                         | <ul style="list-style-type: none"> <li>• Down Syndrome (ICD-10 code: Q90)</li> </ul>                                                                                                                                                                                                    | present/absent                                                  |
| Malnutrition                                                          | <ul style="list-style-type: none"> <li>• Malnutrition (ICD-10 code: E40-E46)</li> </ul>                                                                                                                                                                                                 | present/absent                                                  |
| Disorders of newborn related to length of gestation and fetal growth  | <ul style="list-style-type: none"> <li>• Disorders of newborn related to length of gestation and fetal growth (ICD-10 code: P05-P08)</li> </ul>                                                                                                                                         | present/absent                                                  |
| Neoplasms                                                             | <ul style="list-style-type: none"> <li>• Neoplasms (ICD-10 code: C00-D49)</li> </ul>                                                                                                                                                                                                    | present/absent                                                  |
| Congenital malformations of the circulatory system                    | <ul style="list-style-type: none"> <li>• Congenital malformations of the circulatory system (ICD-10 code: Q20-Q28)</li> </ul>                                                                                                                                                           | present/absent                                                  |
| Heart disease                                                         | <ul style="list-style-type: none"> <li>• Ischemic heart diseases (ICD-10 code: I20-I25)</li> <li>• Other forms of heart disease</li> </ul>                                                                                                                                              | present/absent                                                  |

|                         |                                                                                                                                                                                                                                                                                                                                                                                                                                                                                                                                                                                                                                                                                                                                                                                                                                                                                                                                                                                                                                                                                                                                                                                                                                                                                                                                                                                                                                                                                          |                |
|-------------------------|------------------------------------------------------------------------------------------------------------------------------------------------------------------------------------------------------------------------------------------------------------------------------------------------------------------------------------------------------------------------------------------------------------------------------------------------------------------------------------------------------------------------------------------------------------------------------------------------------------------------------------------------------------------------------------------------------------------------------------------------------------------------------------------------------------------------------------------------------------------------------------------------------------------------------------------------------------------------------------------------------------------------------------------------------------------------------------------------------------------------------------------------------------------------------------------------------------------------------------------------------------------------------------------------------------------------------------------------------------------------------------------------------------------------------------------------------------------------------------------|----------------|
|                         | (ICD-10 code: I30-I5A)                                                                                                                                                                                                                                                                                                                                                                                                                                                                                                                                                                                                                                                                                                                                                                                                                                                                                                                                                                                                                                                                                                                                                                                                                                                                                                                                                                                                                                                                   |                |
| Neuromuscular Disorders | <ul style="list-style-type: none"> <li>Myasthenia gravis and other myoneural disorders (ICD-10 code: G70)</li> </ul>                                                                                                                                                                                                                                                                                                                                                                                                                                                                                                                                                                                                                                                                                                                                                                                                                                                                                                                                                                                                                                                                                                                                                                                                                                                                                                                                                                     | present/absent |
| Chemotherapy            | <ul style="list-style-type: none"> <li>Chemotherapy (TNX procedure code: 1002)</li> </ul>                                                                                                                                                                                                                                                                                                                                                                                                                                                                                                                                                                                                                                                                                                                                                                                                                                                                                                                                                                                                                                                                                                                                                                                                                                                                                                                                                                                                | present/absent |
| COVID-19 vaccination    | <ul style="list-style-type: none"> <li>SARS-CoV-2 (COVID-19) Vaccine (CDC CVX (vaccine administered) code: 213)</li> <li>Severe acute respiratory syndrome coronavirus 2 (SARS-CoV-2) (coronavirus disease [COVID-19]) vaccine, mRNA-LNP, spike protein, preservative free, 30 mcg/0.3 mL dosage, diluent reconstituted, for intramuscular use (CPT code 91300)</li> <li>Severe acute respiratory syndrome coronavirus 2 (SARS-CoV-2) (coronavirus disease [COVID-19]) vaccine, mRNA-LNP, spike protein, preservative free, 100 mcg/0.5 mL dosage, for intramuscular use (CPT code 91300)</li> <li>Severe acute respiratory syndrome coronavirus 2 (SARS-CoV-2) (coronavirus disease [COVID-19]) vaccine, DNA, spike protein, adenovirus type 26 (Ad26) vector, preservative free, 5x10<sup>10</sup> viral particles/0.5 mL dosage, for intramuscular use (CPT code 91303)</li> <li>Severe acute respiratory syndrome coronavirus 2 (SARS-CoV-2) (coronavirus disease [COVID-19]) vaccine, mRNA-LNP, spike protein, preservative free, 30 mcg/0.3 mL dosage, tris-sucrose formulation, for intramuscular use (CPT code 91305)</li> <li>Severe acute respiratory syndrome coronavirus 2 (SARS-CoV-2) (coronavirus disease [COVID-19]) vaccine, mRNA-LNP, spike protein, preservative free, 50 mcg/0.25 mL dosage, for intramuscular use (CPT code 91306)</li> <li>Severe acute respiratory syndrome coronavirus 2 (SARS-CoV-2) (coronavirus disease [COVID-19]) vaccine, mRNA-</li> </ul> | present/absent |

|  |                                                                                                                                                                                                                                                                                                                                                                                                                                                                                                                                                                                                                                                                                                         |  |
|--|---------------------------------------------------------------------------------------------------------------------------------------------------------------------------------------------------------------------------------------------------------------------------------------------------------------------------------------------------------------------------------------------------------------------------------------------------------------------------------------------------------------------------------------------------------------------------------------------------------------------------------------------------------------------------------------------------------|--|
|  | <p>LNP, spike protein, preservative free, 10 mcg/0.2 mL dosage, diluent reconstituted, tris-sucrose formulation, for intramuscular use (CPT code 91307)</p> <ul style="list-style-type: none"> <li>Severe acute respiratory syndrome coronavirus 2 (SARS-CoV-2) (coronavirus disease [COVID-19]) vaccine, mRNA-LNP, spike protein, preservative free, 3 mcg/0.2 mL dosage, diluent reconstituted, tris-sucrose formulation, for intramuscular use (CPT code 91308)</li> <li>Severe acute respiratory syndrome coronavirus 2 (SARS-CoV-2) (coronavirus disease [COVID-19]) vaccine, mRNA-LNP, spike protein, preservative free, 25 mcg/0.25 mL dosage, for intramuscular use (CPT code 91311)</li> </ul> |  |
|--|---------------------------------------------------------------------------------------------------------------------------------------------------------------------------------------------------------------------------------------------------------------------------------------------------------------------------------------------------------------------------------------------------------------------------------------------------------------------------------------------------------------------------------------------------------------------------------------------------------------------------------------------------------------------------------------------------------|--|

**Supplemental Table 2.** Characteristics of the 2022 study cohorts of children aged 0–1 year (age as of 10/2022) who had medical encounters with healthcare organizations in 10/2022 and had no prior medically attended RSV infection before and after propensity-score matching for the listed variables.

|                                            | Before Propensity-Score Matching |                     |       | After Propensity-Score Matching |                     |       |
|--------------------------------------------|----------------------------------|---------------------|-------|---------------------------------|---------------------|-------|
|                                            | COVID-19 (+) cohort              | COVID-19 (-) cohort | SMD   | COVID-19 (+) cohort             | COVID-19 (-) cohort | SMD   |
| <b>Total number</b>                        | 5,193                            | 93,912              |       | 5,192                           | 5,192               |       |
| <b>Age at index event (years, mean±SD)</b> | 0.7± 0.4                         | 0.4± 0.5            | 0.68* | 0.7± 0.4                        | 0.7± 0.4            | <.001 |
| <b>Sex (%)</b>                             |                                  |                     |       |                                 |                     |       |
| Female                                     | 47.0                             | 47.0                | <.001 | 47.0                            | 47.1                | 0.003 |
| Male                                       | 53.0                             | 53.0                | <.001 | 53.0                            | 52.9                | 0.003 |
| <b>Ethnicity (%)</b>                       |                                  |                     |       |                                 |                     |       |
| Hispanic/Latinx                            | 24.9                             | 21.0                | 0.09  | 24.9                            | 24.5                | 0.009 |
| Not Hispanic/Latinx                        | 58.6                             | 56.4                | 0.04  | 58.6                            | 59.2                | 0.01  |
| Unknown                                    | 16.5                             | 22.6                | 0.15* | 16.5                            | 16.4                | 0.005 |
| <b>Race (%)</b>                            |                                  |                     |       |                                 |                     |       |
| Asian                                      | 2.6                              | 3.2                 | 0.04  | 2.6                             | 2.7                 | 0.007 |
| Black                                      | 15.2                             | 15.3                | 0.002 | 15.2                            | 14.9                | 0.008 |
| White                                      | 59.1                             | 56.5                | 0.05  | 59.1                            | 59.6                | 0.01  |

|                                                                       |      |      |       |      |      |       |
|-----------------------------------------------------------------------|------|------|-------|------|------|-------|
| Unknown                                                               | 22.7 | 24.5 | 0.04  | 22.7 | 22.4 | 0.008 |
| <b>Adverse socioeconomic determinants of health (%)</b>               | 5.2  | 2.5  | 0.14* | 5.1  | 5.4  | 0.01  |
| <b>Pre-existing medical conditions and treatments (%)</b>             |      |      |       |      |      |       |
| Diseases related to blood and immune mechanisms                       | 8.5  | 3.5  | 0.21* | 8.4  | 8.3  | 0.003 |
| Diseases related to immune mechanisms                                 | 1.2  | 0.3  | 0.10* | 1.2  | 1.2  | <.001 |
| Chronic lower respiratory diseases                                    | 2.9  | 0.9  | 0.15* | 2.9  | 2.7  | 0.01  |
| Chronic lower respiratory diseases originating in the prenatal period | 1.5  | 1.0  | 0.04  | 1.5  | 1.5  | 0.006 |
| Asthma                                                                | 2.4  | 0.8  | 0.13* | 2.4  | 2.1  | 0.02  |
| Down syndrome                                                         | 0.6  | 0.3  | 0.04  | 0.6  | 0.6  | 0.005 |
| Malnutrition                                                          | 1.4  | 0.5  | 0.09  | 1.4  | 1.1  | 0.02  |
| Disorders of newborn related to length of gestation and fetal growth  | 8.7  | 5.3  | 0.13* | 8.7  | 9.0  | 0.01  |
| Neoplasms                                                             | 5.7  | 3.0  | 0.13* | 5.6  | 5.9  | 0.01  |
| Congenital malformations of the circulatory system                    | 6.4  | 4.1  | 0.10* | 6.3  | 6.3  | 0.001 |
| Heart diseases                                                        | 4.0  | 1.8  | 0.13* | 4.0  | 4.0  | 0.004 |
| Neuromuscular Disorders                                               | 0.2  | 0.0  | <.001 | 0.2  | 0.2  | <.001 |
| Chemotherapy                                                          | 0.6  | 0.2  | 0.06  | 0.6  | 0.5  | 0.01  |
| COVID-19 vaccines                                                     | 7.7  | 3.3  | 0.17* | 7.7  | 7.7  | 0.003 |

COVID-19 (+) cohort – children who contracted COVID-19 prior to 8/2022 as documented in their EHRs. COVID-19 (-) cohort – children who had no documented COVID-19 in their EHRs. Index event was a medical visit in 10/2022. Cohorts were propensity-score matched for the list variables with variable status based on anytime to 1 day before the index event. The status of adverse socioeconomic determinants of health (SDOHs) was based on the ICD-10 code “Persons with potential health hazards related to socioeconomic and psychosocial circumstances” (Z55-



Z65), which includes codes “Problems related to housing and economic circumstances” (Z59), “Problems related to upbringing” (Z62), among others. SMD – standardized mean differences. \*SMD greater than 0.1, a threshold recommended for declaring imbalance.

**Supplemental Table 3.** Characteristics of the 2021 study cohorts of children aged 0-1 year (age as of 7/2021-8/2021) who had medical encounters with healthcare organizations during 7/2021-8/2021 and had no prior medically attended RSV infection, before and after propensity-score matching the listed variables.

|                                                           | Before Propensity-Score Matching |                     |       | After Propensity-Score Matching |                     |       |
|-----------------------------------------------------------|----------------------------------|---------------------|-------|---------------------------------|---------------------|-------|
|                                                           | COVID-19 (+) cohort              | COVID-19 (-) cohort | SMD   | COVID-19 (+) cohort             | COVID-19 (-) cohort | SMD   |
| <b>Total number</b>                                       | 2,671                            | 160,100             |       | 2,670                           | 2,670               |       |
| <b>Age at index event (years, mean±SD)</b>                | 0.7± 0.4                         | 0.5± 0.5            | 0.61* | 0.7± 0.4                        | 0.7± 0.4            | 0.005 |
| <b>Sex (%)</b>                                            |                                  |                     |       |                                 |                     |       |
| Female                                                    | 45.4                             | 46.9                | 0.03  | 45.4                            | 46.0                | 0.01  |
| Male                                                      | 54.6                             | 53.1                | 0.03  | 54.6                            | 54.0                | 0.01  |
| <b>Ethnicity (%)</b>                                      |                                  |                     |       |                                 |                     |       |
| Hispanic/Latinx                                           | 33.9                             | 20.9                | 0.29* | 33.9                            | 33.7                | 0.002 |
| Not Hispanic/Latinx                                       | 53.4                             | 57.0                | 0.07  | 53.4                            | 53.0                | 0.01  |
| Unknown                                                   | 12.7                             | 22.1                | 0.25* | 12.7                            | 12.3                | 0.01  |
| <b>Race (%)</b>                                           |                                  |                     |       |                                 |                     |       |
| Asian                                                     | 2.4                              | 3.0                 | 0.04  | 2.4                             | 2.2                 | 0.01  |
| Black                                                     | 20.3                             | 19.8                | 0.01  | 20.3                            | 20.8                | 0.01  |
| White                                                     | 56.3                             | 55.8                | 0.01  | 56.3                            | 56.0                | 0.005 |
| Unknown                                                   | 20.7                             | 20.9                | 0.004 | 20.7                            | 20.6                | 0.004 |
| <b>Adverse socioeconomic determinants of health (%)</b>   | 6.4                              | 2.5                 | 0.19* | 6.4                             | 6.9                 | 0.02  |
| <b>Pre-existing medical conditions and treatments (%)</b> |                                  |                     |       |                                 |                     |       |
| Diseases related to blood and immune mechanisms           | 10.7                             | 3.6                 | 0.28* | 10.7                            | 10.7                | <.001 |
| Diseases related to immune mechanisms                     | 1.2                              | 0.4                 | 0.08  | 1.2                             | 1.1                 | 0.007 |
| Chronic lower                                             | 3.1                              | 0.9                 | 0.16* | 3.1                             | 2.9                 | 0.009 |

|                                                                       |     |     |       |     |     |       |
|-----------------------------------------------------------------------|-----|-----|-------|-----|-----|-------|
| respiratory diseases                                                  |     |     |       |     |     |       |
| Chronic lower respiratory diseases originating in the prenatal period | 1.5 | 0.8 | 0.07  | 1.5 | 1.3 | 0.02  |
| Asthma                                                                | 2.8 | 0.8 | 0.15* | 2.7 | 2.7 | 0.005 |
| Down syndrome                                                         | 0.8 | 0.3 | 0.06  | 0.8 | 0.7 | 0.004 |
| Malnutrition                                                          | 1.3 | 0.5 | 0.10* | 1.3 | 1.0 | 0.03  |
| Disorders of newborn related to length of gestation and fetal growth  | 7.7 | 4.4 | 0.14* | 7.7 | 7.6 | 0.004 |
| Neoplasms                                                             | 5.4 | 3.0 | 0.12* | 5.4 | 5.7 | 0.01  |
| Congenital malformations of the circulatory system                    | 7.6 | 3.7 | 0.17* | 7.6 | 7.5 | 0.006 |
| Heart disease                                                         | 5.1 | 1.7 | 0.19* | 5.0 | 5.0 | 0.002 |
| Neuromuscular Disorders                                               | 0.4 | 0.0 | 0.08  | 0.4 | 0.4 | <.001 |
| Chemotherapy                                                          | 0.4 | 0.2 | 0.04  | 0.4 | 0.4 | 0.006 |

COVID-19 (+) cohort – children who contracted COVID-19 prior to 6/1/2022 as documented in their EHRs. COVID-19 (-) cohort – children who had no documented COVID-19 in their EHRs. Index event was a medical encounter during 7/2021-8/2021. Cohorts were propensity-score matched for the list variables with status based on anytime to 1 day before the index event. The status of adverse socioeconomic determinants of health (SDOHs) was based on the ICD-10 code “Persons with potential health hazards related to socioeconomic and psychosocial circumstances” (Z55-Z65), which includes codes “Problems related to housing and economic circumstances” (Z59), “Problems related to upbringing” (Z62), among others. SMD – standardized mean differences. \*SMD greater than 0.1, a threshold being recommended for declaring imbalance.
